# Supplementary material for: Electronic and magnetic states of Fe ions in Co2FeBO5
Source: Royal Society of Chemistry journal article supplement (doi:10.1039/d1dt00125f), 2021-01-01
Supplement: d1dt00125f1.pdf [file d1dt00125f1.pdf]

## Electronic Supplementary Information

### Electronic and magnetic states of Fe ions in the $\text{Co}_2\text{FeBO}_5$

Yu.V. Knyazev<sup>1</sup>, N.V. Kazak<sup>1\*</sup>, V.S. Zhandun<sup>1</sup>, J. Bartolomé<sup>2</sup>, A. Arauzo<sup>2,3</sup>,  
N.A. Belskaya<sup>4</sup>, O.A. Bayukov<sup>1</sup>, and S.G. Ovchinnikov<sup>1</sup>

<sup>1</sup>Kirensky Institute of Physics, Federal Research Center KSC SB RAS, 660036 Krasnoyarsk, Russia

<sup>2</sup>Instituto de Nanociencia y Materiales de Aragón, CSIC-Universidad de Zaragoza and Departamento de Física de la Materia Condensada, 50009 Zaragoza, Spain

<sup>3</sup>Servicio de Medidas Físicas, Universidad de Zaragoza, 50009 Zaragoza, Spain

<sup>4</sup>Reshetnev Siberian State University of Science and Technology, 660037 Krasnoyarsk, Russia

*E-mail: nat@iph.krasn.ru*

### Details of the calculations of the probabilities of the quadrupole splittings ( $P(QS)$ ) and hyperfine fields ( $P(H_{hf})$ ).

The interpretation of the spectra was performed in two stages. At the first stage, the probability distribution of the quadrupole splitting  $P(QS)$  was determined. Such calculation gives possible nonequivalent iron positions in the samples.

To perform the  $P(QS)/P(H_{hf})$  calculation, the experimental spectrum was filled by a number of doublets/sextets with Lorentzian line-form and natural line-width ( $W = 0.24$  mm/s for  $^{57}\text{Co}(\text{Rh})$  source) and  $QS/H_{hf}$  with the step  $\Delta = 0.01$  mm/s (1.3 kOe) (in our case, from 0.00 mm/s to 2.2 mm/s and from 200 to 560 kOe). Then, the isomer shift and intensity of Mössbauer lines were varied. As a result, we obtained the set of the intensities corresponding to each doublet/sextet in our series. These data conform to the probability of each doublet/sextet existence in the experimental spectrum.

Then, based on these calculations, we formed a preliminary spectrum. It contained a set of Mössbauer doublets, corresponding to possible non-equivalent positions and modelling as a group of the analytical functions. This group was fitted to the experimental spectrum by varying the entire set of hyperfine parameters using the least-squares method in the linear approximation ( $\chi^2$  criterion). Mössbauer absorption lines were represented by the pseudo-Voigt function, following the equation

$$I = I \left( \frac{k}{(1+x_i)^2} + (1-k) \cdot e^{-\ln 2 \cdot x_i^2} \right)$$

Here,  $x_i = 2 \cdot \left( \frac{IS-i}{W} \right)$ ,  $i$  – is a channel number.  $I$ ,  $IS$  and  $W$  are hyperfine parameters (line intensity, isomer shift, and line-width, respectively), nominated in channels,  $k$  – is the Lorentz-Gauss parameter, which determines the absorption line form. In our case the approximation of the Lorentz form was used, i.e.  $k = 1$ .

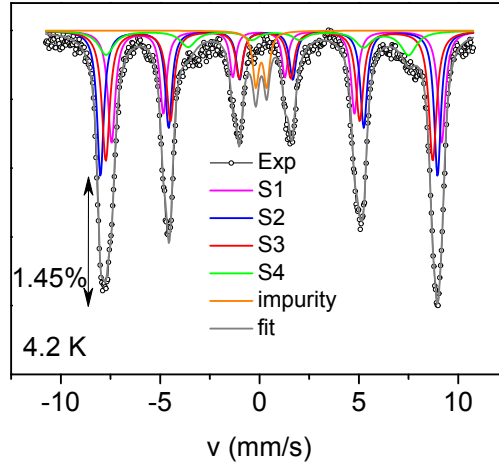

Fig. 1S. The original Mössbauer spectrum measured at  $T=4.2$  K. The solid lines S1, S2, S3, and S4 indicate the calculated spectrum components corresponding to high-spin  $\text{Fe}^{3+}$  ions in the  $\text{Co}_2\text{FeBO}_5$  ludwigite, the orange line corresponds to an accident impurity as a result of grinding. The absorption scale is shown in the %.

Table S1. The hyperfine structure parameters for  $\text{Co}_2\text{FeBO}_5$  obtained at intermediate temperatures:  $IS$  – isomer chemical shift with respect to  $\alpha\text{Fe}$  ( $\pm 0.01$  mm/s),  $H_{\text{hf}}$  – hyperfine field ( $\pm 10$  kOe),  $QS, 2\varepsilon$  – quadruple splitting in the paramagnetic and magnetic regimes, respectively ( $\pm 0.02$  mm/s),  $W$  is the half-line width ( $\pm 0.06$  mm/s),  $dH_{\text{hf}}$  is the hyperfine magnetic field spread modulating the line-width,  $A$  is the area of the corresponding component (the iron occupation factor) ( $\pm 0.03$  a.u.).

| $T$<br>(K) |    | $IS$<br>(mm/s) | $H_{\text{hf}}$<br>(kOe) | $QS, 2\varepsilon$<br>(mm/s) | $W$<br>(mm/s) | $dH_{\text{hf}}$<br>(mm/s) | $A$ (a.u.) |
|------------|----|----------------|--------------------------|------------------------------|---------------|----------------------------|------------|
| 147        | D1 | 0.49           |                          | 1.91                         | 0.34          |                            | 0.10       |
|            | D2 | 0.46           |                          | 1.14                         | 0.37          |                            | 0.51       |
|            | D3 | 0.48           |                          | 0.92                         | 0.26          |                            | 0.25       |
|            | D4 | 0.48           |                          | 0.66                         | 0.27          |                            | 0.14       |
| 120        | D1 | 0.50           |                          | 1.89                         | 0.39          |                            | 0.12       |
|            | D2 | 0.48           |                          | 1.16                         | 0.36          |                            | 0.49       |
|            | D3 | 0.48           |                          | 0.92                         | 0.26          |                            | 0.24       |
|            | D4 | 0.48           |                          | 0.63                         | 0.29          |                            | 0.15       |
| 60         | S1 | 0.52           | 493                      | 1.60                         | 0.44          | 0.08                       | 0.17       |
|            | S2 | 0.48           | 495                      | 0.20                         | 0.53          | 0.13                       | 0.26       |
|            | S3 | 0.47           | 446                      | 0.67                         | 0.52          | 0.68                       | 0.25       |
|            | S4 | 0.49           | 402                      | -0.44                        | 0.81          | 2.15                       | 0.32       |
| 20         | S1 | 0.53           | 517                      | 1.86                         | 0.28          | 0.15                       | 0.20       |
|            | S2 | 0.53           | 527                      | 0.27                         | 0.40          | 0.00                       | 0.27       |
|            | S3 | 0.48           | 513                      | 0.54                         | 0.41          | 0.00                       | 0.36       |
|            | S4 | 0.51           | 462                      | -1.16                        | 1.17          | 0.00                       | 0.18       |

Table S2. Lattice parameters and unit-cell volume for  $\text{Co}_2\text{FeBO}_5$  calculated from the DFT-optimized structure for the “Fe4(HS)”, “Fe4(HS,LS)”, and “Fe4-Fe2-Fe4” models at  $T=0$  K and obtained from single crystal X-ray diffraction experiment at  $T=296$  K [17].

|                       | “Fe4(HS)”        | “Fe4(HS,LS)”     | “Fe4-Fe2-Fe4”    | Experiment <sup>[16]</sup> |
|-----------------------|------------------|------------------|------------------|----------------------------|
| Space group           | <i>Pbam</i> (55) | <i>Pbam</i> (55) | <i>Pbam</i> (55) | <i>Pbam</i> (55)           |
| $a$ (Å)               | 9.3224           | 9.2547           | 9.1956           | 9.3818                     |
| $b$ (Å)               | 12.259           | 12.2266          | 12.1626          | 12.3445                    |
| $c$ (Å)               | 3.0095           | 2.9721           | 3.0106           | 3.0578                     |
| $V$ (Å <sup>3</sup> ) | 343.94           | 336.31           | 336.72           | 354.13                     |

Table S3. The occupation numbers and anisotropy  $\Delta n_d$  of the spin-up and spin-down Fe3*d*-shell of Fe ions occupying metal sites in  $\text{Co}_2\text{FeBO}_5$  according to three cation distribution.

| Model         | Fe site |           | $n_{xz}$ | $n_{yz}$ | $n_{xy}$ | $n_{x^2-y^2}$ | $n_{z^2}$ | $\Delta n_d$ |
|---------------|---------|-----------|----------|----------|----------|---------------|-----------|--------------|
| “Fe4(HS)”     | Fe4(HS) | spin-up   | 0.27     | 0.21     | 0.21     | 0.27          | 0.19      | 0.050        |
|               |         | spin-down | 0.95     | 0.93     | 0.95     | 0.95          | 0.95      | 0.010        |
| “Fe4(HS,LS)”  | Fe4(HS) | spin-up   | 0.27     | 0.21     | 0.21     | 0.26          | 0.21      | 0.020        |
|               |         | spin-down | 0.94     | 0.95     | 0.93     | 0.95          | 0.95      | -0.015       |
|               | Fe4(LS) | spin-up   | 0.43     | 0.66     | 0.54     | 0.60          | 0.48      | 0.115        |
|               |         | spin-down | 0.47     | 0.84     | 0.72     | 0.67          | 0.71      | 0.025        |
| “Fe4-Fe2-Fe4” | Fe4(HS) | spin-up   | 0.27     | 0.21     | 0.21     | 0.26          | 0.20      | 0.030        |
|               |         | spin-down | 0.94     | 0.93     | 0.95     | 0.95          | 0.95      | 0.015        |
|               | Fe2(LS) | spin-up   | 0.43     | 0.87     | 0.54     | 0.79          | 0.84      | -0.160       |
|               |         | spin-down | 0.66     | 0.52     | 0.41     | 0.94          | 0.45      | 0.310        |
